# Supplementary material for: Biomimetically synthesized luminescent Tb3+-doped fluorapatite/agar nanocomposite for detecting UO22+, Cu2+, and Cr3+ions
Source: Royal Society of Chemistry journal article supplement (doi:10.1039/d1en00648g), 2021-01-01
Supplement: d1en00648g1.pdf [file d1en00648g1.pdf]

## Supplementary Information

### Biomimetically Synthesized Luminescent Tb<sup>3+</sup>-Doped Fluorapatite/Agar Nanocomposite for Detecting UO<sub>2</sub><sup>2+</sup>, Cu<sup>2+</sup>, and Cr<sup>3+</sup> Ions

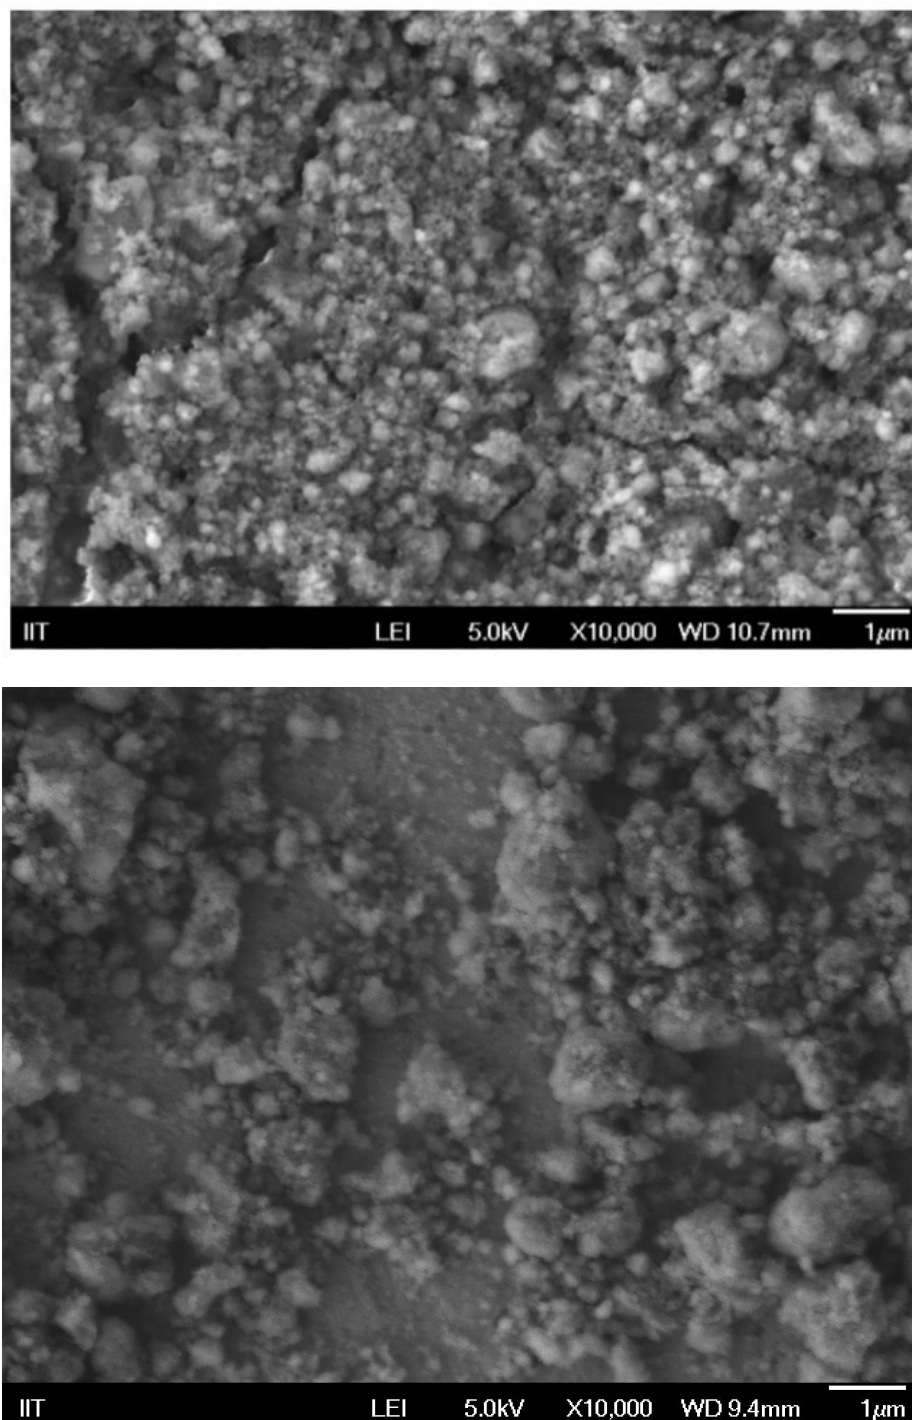

**Figure S1.** SEM images of the Tb-HAP/agar sample.

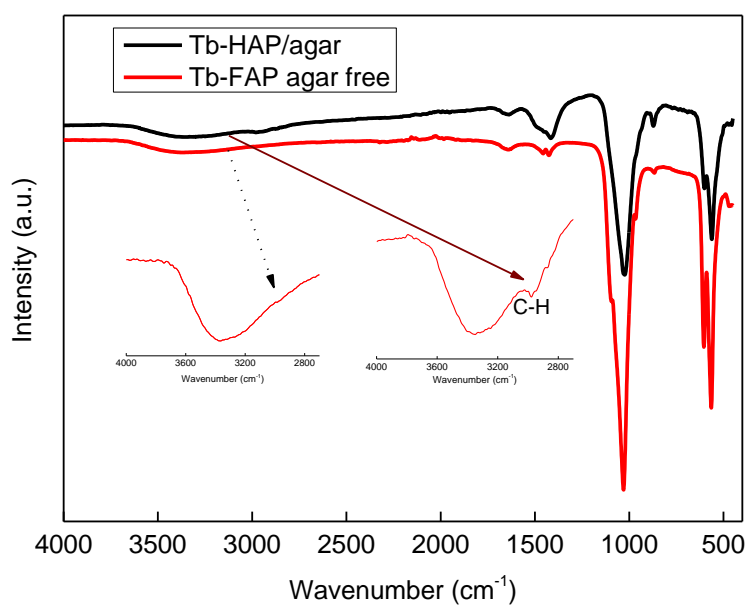

**Figure S2.** The FT-IR spectra of the Tb-HAP/agar and Tb-FAP agar free samples.

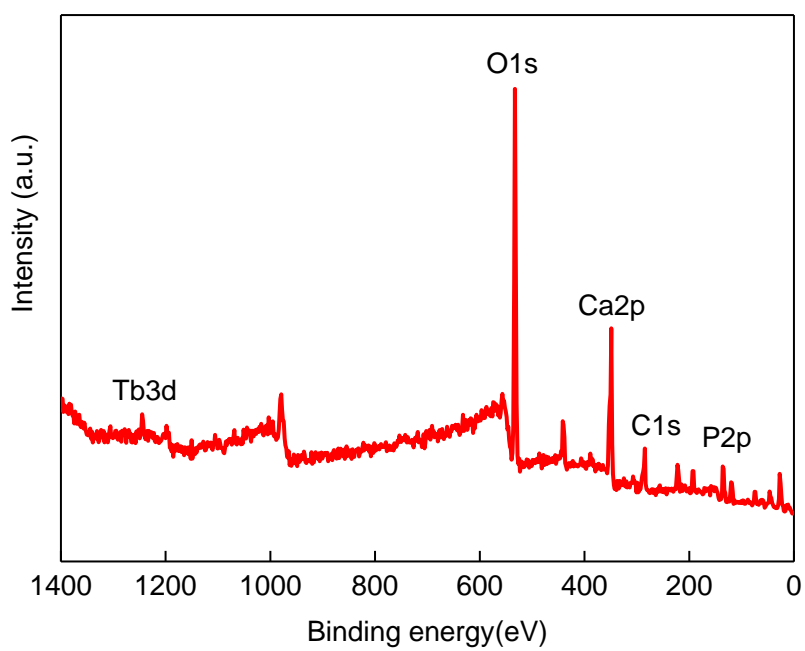

**Figure S3.** Survey scan of the XPS spectrum of the Tb-HAP/agar sample.

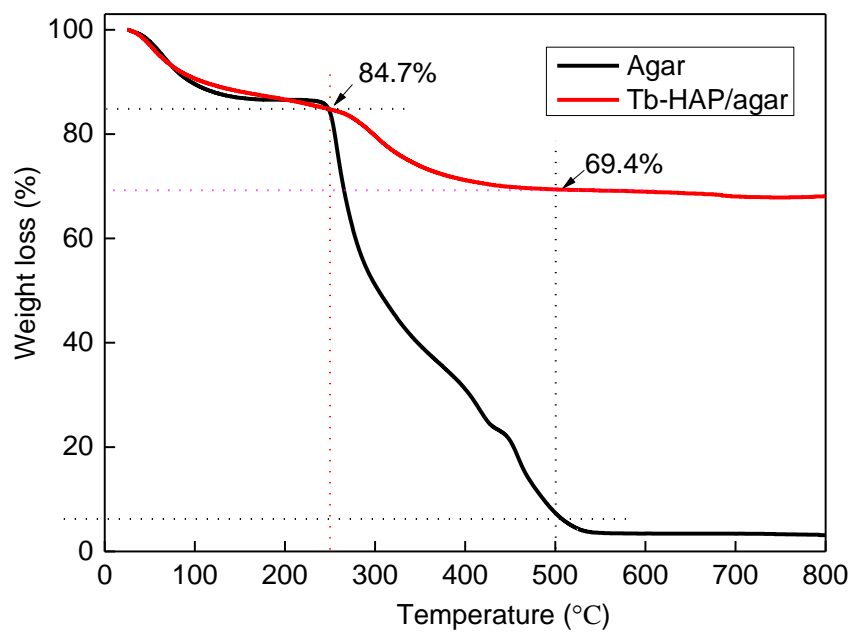

**Figure S4.** TGA plots of the Tb-HAP/agar and agar samples.

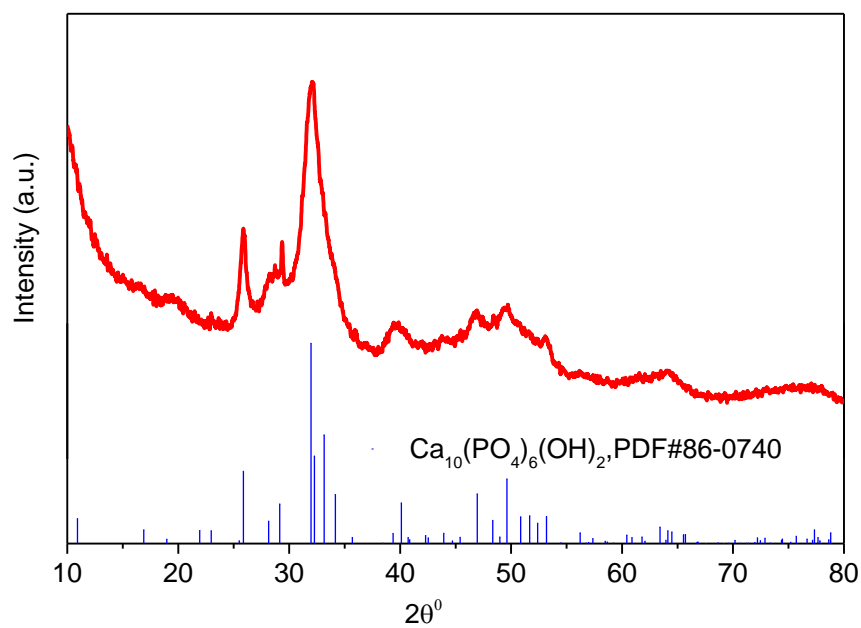

**Figure S5.** XRD pattern of the Tb-HAP/agar sample accompanying with the standard pattern (PDF#86-0740).

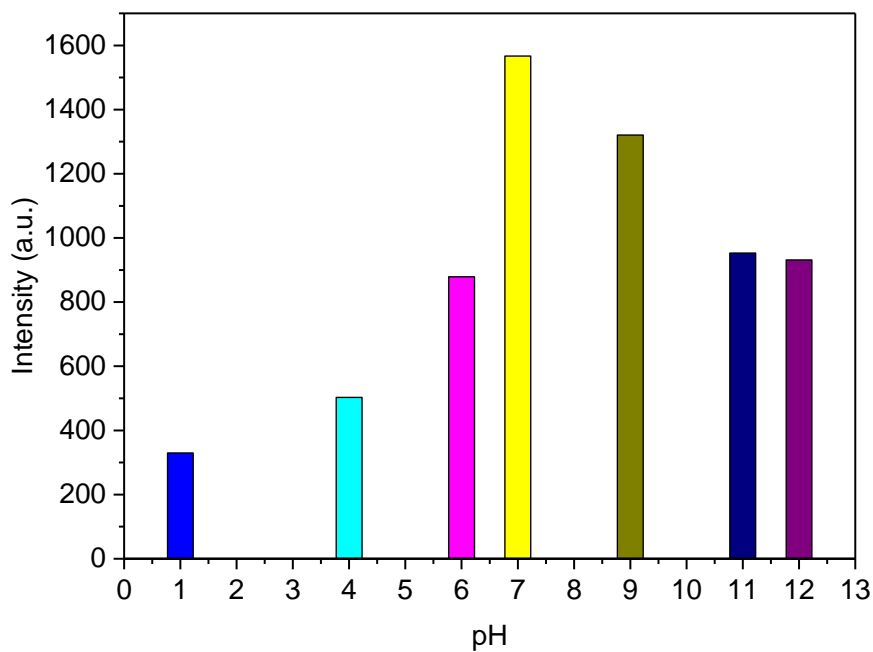

**Figure S6.** Effect of pH on the fluorescence intensity of Tb-FAP/agar samples.

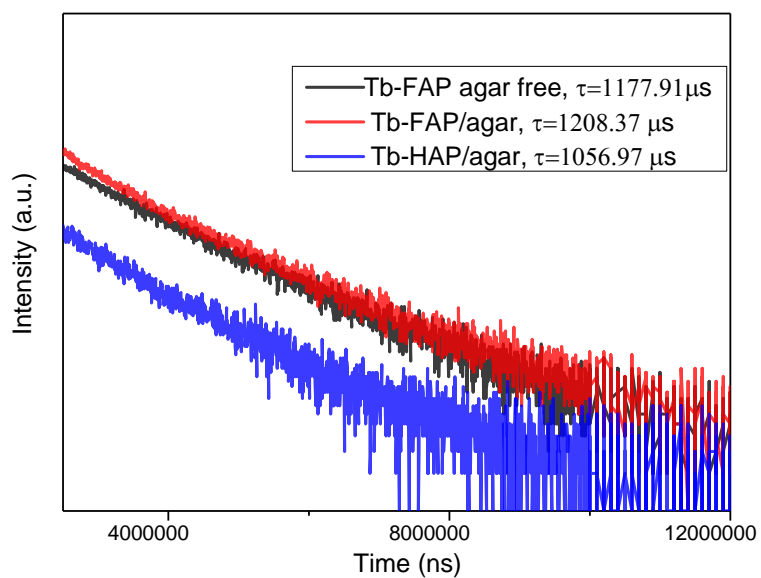

**Figure S7.** Luminescence lifetime curves of the Tb-FAP/agar, Tb-FAP agar free and Tb-HAP/agar samples ( $\lambda_{\text{ex}} = 377 \text{ nm}$  and  $\lambda_{\text{em}} = 543 \text{ nm}$ ).

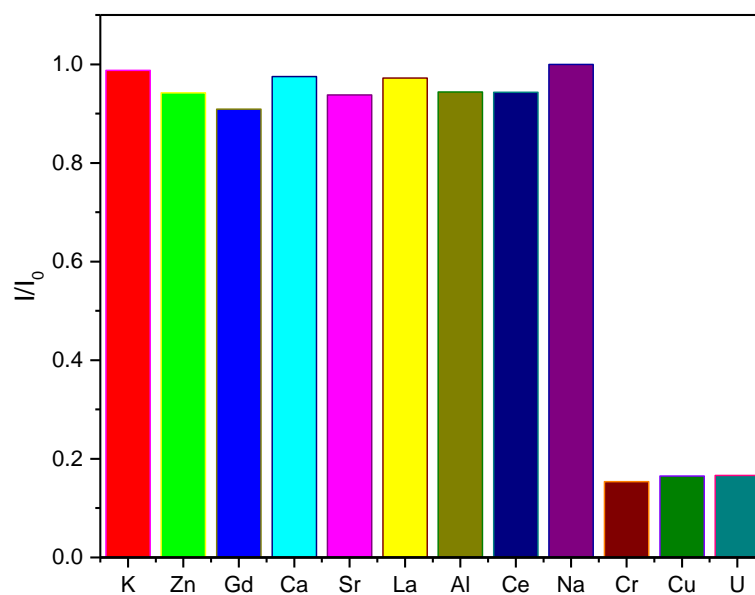

**Figure S8.** Luminescence intensity ratio of the  $Tb^{3+} \ ^5D_4 \rightarrow \ ^7F_4$  transition (543 nm) of the Tb-FAP/agar sample (2.5 mL) after and before treated with different metal ions. ( $K^+$ ,  $Zn^{2+}$ ,  $Gd^{3+}$ ,  $Ca^{2+}$ ,  $Sr^{2+}$ ,  $La^{3+}$ ,  $Al^{3+}$ ,  $Ce^{3+}$ ,  $Na^+$  ions, 100  $\mu$ L, 0.01 M), and ( $UO_2^{2+}$ ,  $Cu^{2+}$ ,  $Cr^{3+}$  ions, 10  $\mu$ L, 0.01 M).

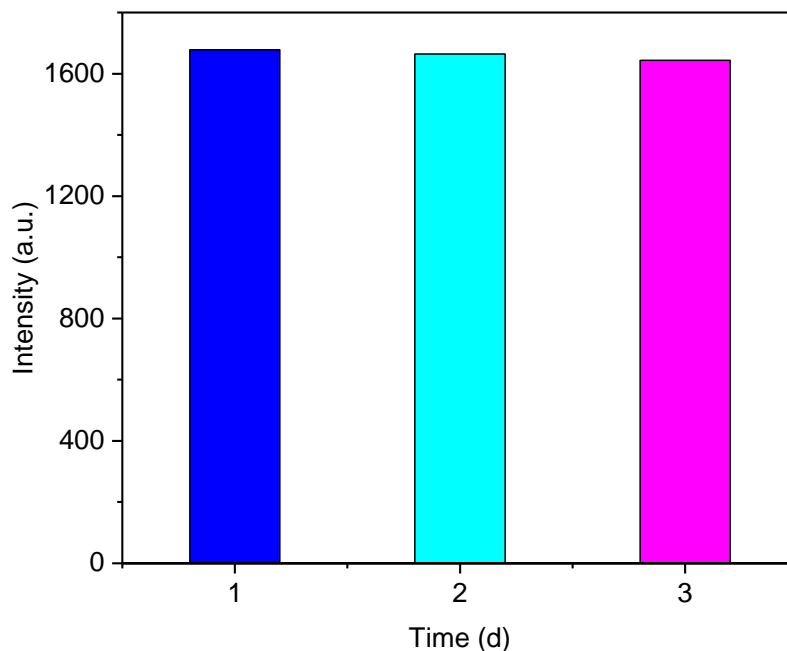

**Figure S9.** Luminescent intensities of the Tb-FAP/agar sample with the increase of storage time (without adding  $UO_2^{2+}$ ,  $Cu^{2+}$ , and  $Cr^{3+}$  ions).

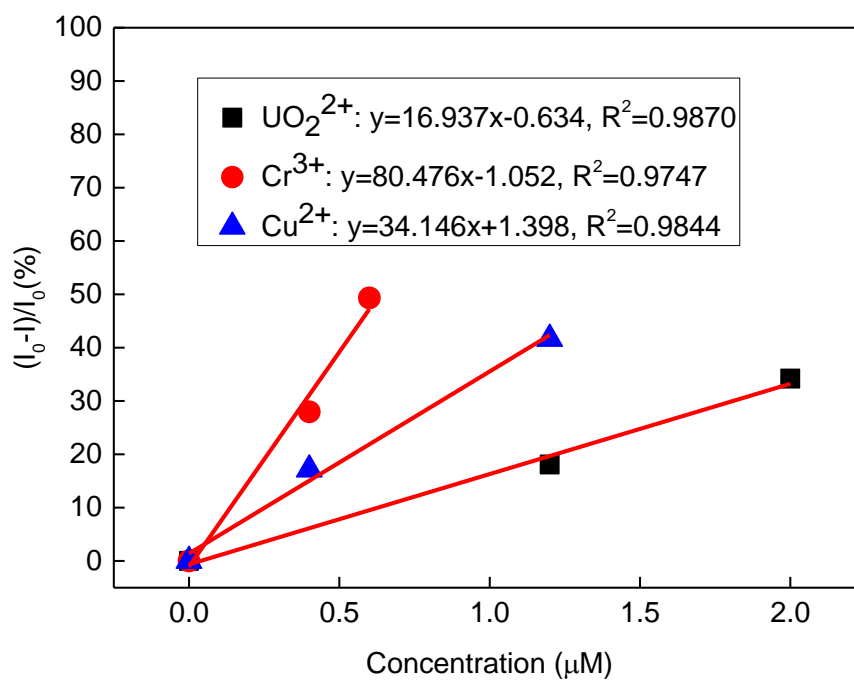

**Figure S10.** The linear fitting relationships between  $(I_0 - I)/I_0$  and the concentration of  $\text{UO}_2^{2+}$ ,  $\text{Cr}^{3+}$ , and  $\text{Cu}^{2+}$  ions.

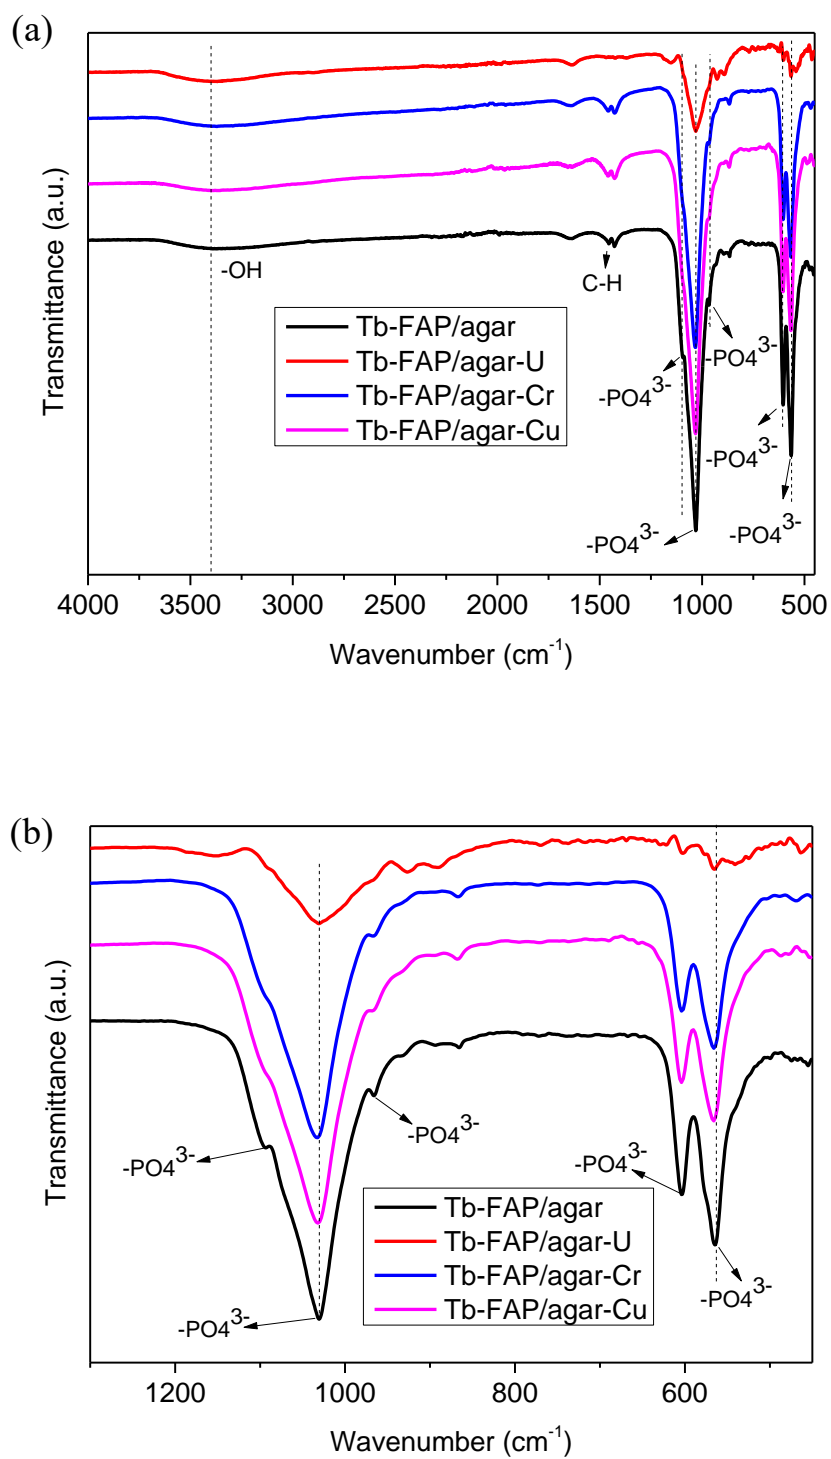

**Figure S11.** (a) FTIR spectra of the Tb-FAP/agar after treated with  $\text{UO}_2^{2+}$ ,  $\text{Cu}^{2+}$  and  $\text{Cr}^{3+}$ . (b) The enlargement of the FTIR spectra in (a) with the wavenumber ranging from 450  $\text{cm}^{-1}$  to 1300  $\text{cm}^{-1}$  to more intuitively indicate the location of the  $\text{PO}_4^{3-}$  peaks.

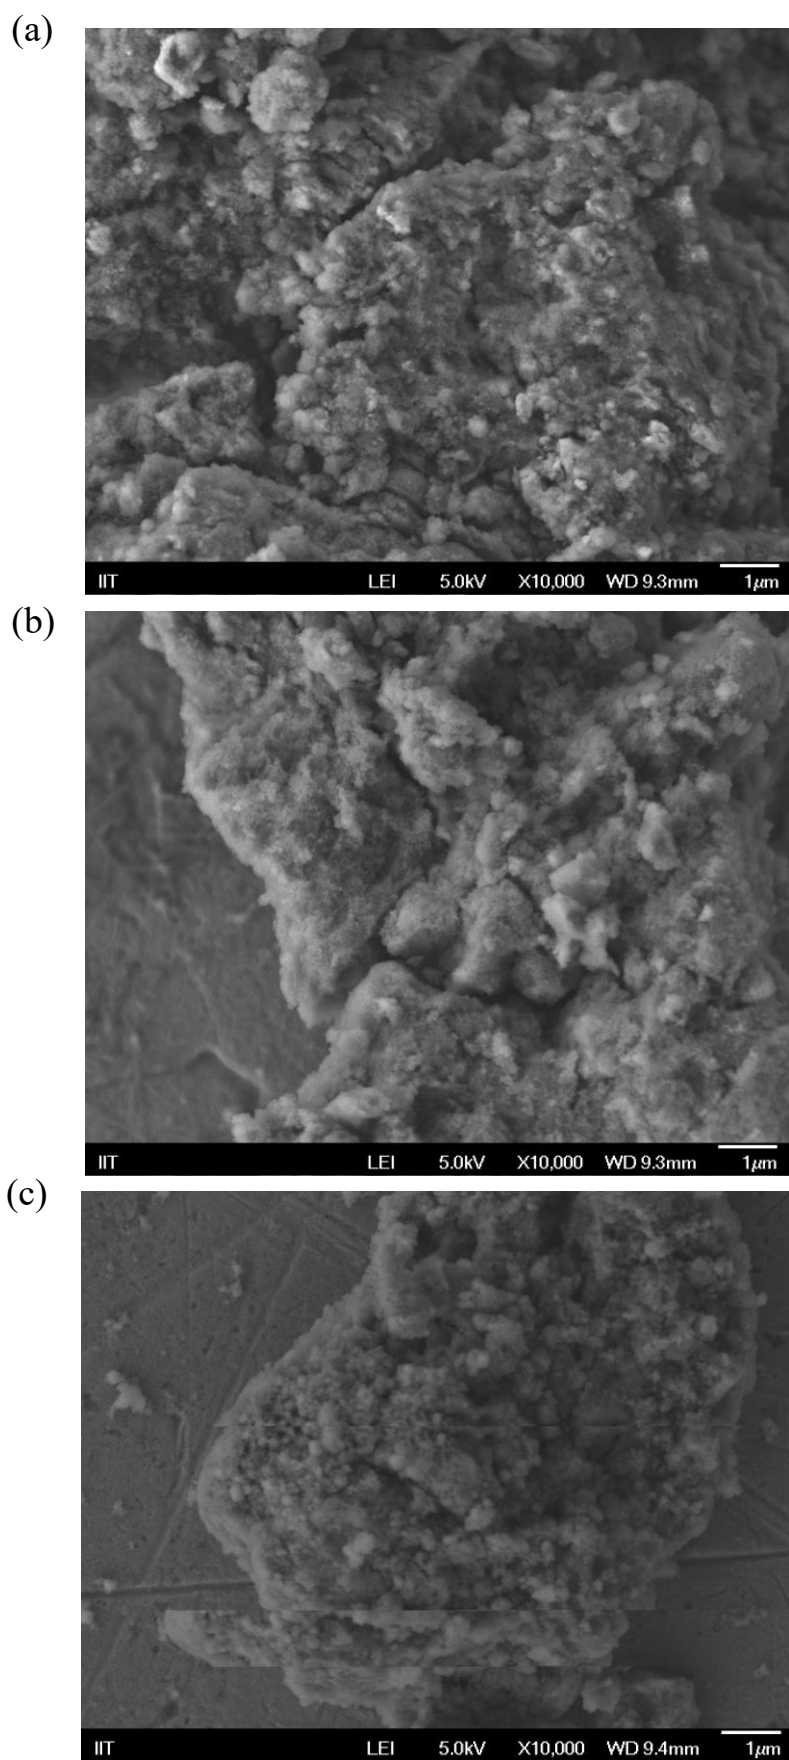

**Figure S12.** SEM images of the Tb-HAP/agar sample after treated with (a)  $\text{UO}_2^{2+}$ , (b)  $\text{Cu}^{2+}$ , and (c)  $\text{Cr}^{3+}$  solutions.



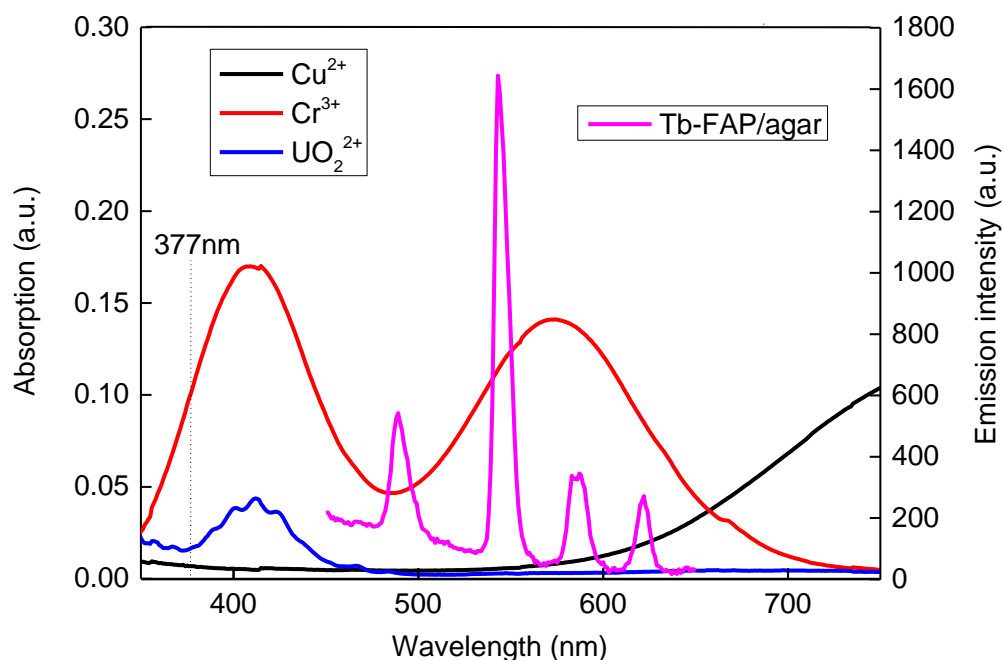

**Figure S13.** The luminescence spectrum of the Tb-FAP/agar sample and the UV-Vis spectra of  $\text{Cu}(\text{NO}_3)_2 \cdot 3\text{H}_2\text{O}$ ,  $\text{Cr}(\text{NO}_3)_3 \cdot 9\text{H}_2\text{O}$ , and  $(\text{UO}_2)(\text{NO}_3)_2$  aqueous solutions.

**Table S1.** Fitting parameters of the luminescence lifetime curves of the Tb-FAP/agar, Tb-FAP agar free and Tb-HAP/agar samples.

| Parameters       | $\tau_1$ ( $\mu\text{s}$ ) | $\tau_2$ ( $\mu\text{s}$ ) | $A_1$   | $A_2$   | $\tau_{\text{ave}}$ ( $\mu\text{s}$ ) | $R^2$  |
|------------------|----------------------------|----------------------------|---------|---------|---------------------------------------|--------|
| Tb-FAP/agar      | 1231.05                    | 2.78                       | 1170.62 | 9739.76 | 1208.37                               | 0.9948 |
| Tb-FAP agar free | 1193.08                    | 2.95                       | 854     | 4466.57 | 1177.91                               | 0.9955 |
| Tb-HAP/agar      | 1107.45                    | 2.68                       | 292.99  | 5798.67 | 1056.97                               | 0.9941 |

Fitting parameters in Table S1 were obtained by using the following biexponential lifetime decay function:

$$y = A_1 \cdot \exp(-x/\tau_1) + A_2 \cdot \exp(-x/\tau_2) + y_0$$

$\tau_{\text{ave}}$  values were calculated according to the equation:

$$\tau_{\text{ave}} = (A_1 \cdot \tau_1^2 + A_2 \cdot \tau_2^2) / (A_1 \cdot \tau_1 + A_2 \cdot \tau_2)$$

**Table S2.** Fitting parameters of luminescence lifetime curves in the absence and presence of metallic ion aqueous solutions

| Parameters                                        | $\tau_1$ ( $\mu\text{s}$ ) | $\tau_2$ ( $\mu\text{s}$ ) | $A_1$   | $A_2$   | $\tau_{\text{ave}}$ ( $\mu\text{s}$ ) | $R^2$  |
|---------------------------------------------------|----------------------------|----------------------------|---------|---------|---------------------------------------|--------|
| Tb-FAP/agar                                       | 1231.05                    | 2.78                       | 1170.62 | 9739.76 | 1208.37                               | 0.9948 |
| Tb-FAP/agar + 7.2 $\mu\text{M}$ $\text{Cu}^{2+}$  | 718.00                     | 3.23                       | 566.74  | 8938.66 | 670.59                                | 0.9854 |
| Tb-FAP/agar + 5.7 $\mu\text{M}$ $\text{Cr}^{3+}$  | 593.46                     | 3.12                       | 457.79  | 8808.25 | 539.26                                | 0.9872 |
| Tb-FAP/agar + 20 $\mu\text{M}$ $\text{UO}_2^{2+}$ | 95.13                      | 2.97                       | 756.81  | 8815.26 | 70.55                                 | 0.9915 |

**Table S3.** Average luminescence lifetimes of the Tb-FAP/agar sample in the presence of different metal ions

|                                    |                  |                  |                  |                  |                  |                    |                  |
|------------------------------------|------------------|------------------|------------------|------------------|------------------|--------------------|------------------|
| Metal ions                         | No ions          | $\text{Al}^{3+}$ | $\text{K}^+$     | $\text{Sr}^{2+}$ | $\text{Ca}^{2+}$ | $\text{Ce}^{3+}$   | $\text{Gd}^{3+}$ |
| $T_{\text{ave}}$ ( $\mu\text{s}$ ) | 1208.37          | 1208.49          | 1211.96          | 1198.27          | 1197.53          | 1188.76            | 1161.52          |
| Metal ions                         | $\text{La}^{3+}$ | $\text{Na}^+$    | $\text{Zn}^{2+}$ | $\text{Cu}^{2+}$ | $\text{Cr}^{3+}$ | $\text{UO}_2^{2+}$ |                  |
| $T_{\text{ave}}$ ( $\mu\text{s}$ ) | 1166.84          | 1136.73          | 1177.84          | 670.59           | 539.26           | 70.55              |                  |

**Determination of the limit of detection (LOD) value:**

The LOD values of the  $\text{UO}_2^{2+}$ ,  $\text{Cr}^{3+}$ , and  $\text{Cu}^{2+}$  ions were determined based on the luminescence measurements shown in Figure S6. The linear domain of the low concentration range can be fitted as:

For  $\text{UO}_2^{2+}$  ions:  $y = 16.937x - 0.634$ ,  $R^2 = 0.9870$

For  $\text{Cu}^{2+}$  ions:  $y = 34.146x + 1.398$ ,  $R^2 = 0.9844$

For  $\text{Cr}^{3+}$  ions:  $y = 80.476x - 1.052$ ,  $R^2 = 0.9747$

where  $y$  is the quenching ratio of luminescence emission intensity [ $100 \times (I_0 - I)/I_0$ ] at 543 nm, and  $x$  is the  $\text{UO}_2^{2+}$ ,  $\text{Cr}^{3+}$ , and  $\text{Cu}^{2+}$  concentration. The standard deviation ( $\sigma$ ) is defined as  $100 \times (I_{\text{SE}}/I_0)$ , where  $I_{\text{SE}}$  is the standard error of the emission measurement of the solution without the Tb-FAP/agar sample and any ions monitored at 543 nm.  $I_0$  is the luminescence intensity of the Tb-FAP/agar sample in deionized water measured at 543 nm. If defining eleven times of the standard deviation as the detectable signal, the LOD values can be calculated as:

$3\sigma/\text{slope} (\text{UO}_2^{2+}) = 7.95 \text{ nM} (2.15 \mu\text{g/L})$

$3\sigma/\text{slope} (\text{Cu}^{2+}) = 3.94 \text{ nM} (0.25 \mu\text{g/L})$

$3\sigma/\text{slope} (\text{Cr}^{3+}) = 1.67 \text{ nM} (0.087 \mu\text{g/L})$
